# Supplementary material for: Intracranial delivery of AAV9 gene therapy partially prevents retinal degeneration and visual deficits in CLN6-Batten disease mice
Source: PubMed Central journal article supplement — Mol Ther Methods Clin Dev. 2021 Jan 5;20:497–507. doi: 10.1016/j.omtm.2020.12.014 (PMC7887332; doi:10.1016/j.omtm.2020.12.014), 2021-01-05
Supplement: mmc1.pdf [file mmc1.pdf]

**Supplemental Information**

**Intracranial delivery of AAV9 gene therapy  
partially prevents retinal degeneration  
and visual deficits in CLN6-Batten disease mice**

**Katherine A. White, Hemanth R. Nelvagal, Timothy A. Poole, Bin Lu, Tyler B. Johnson, Samantha Davis, Melissa A. Pratt, Jon Brudvig, Ana B. Assis, Shibi Likhite, Kathrin Meyer, Brian K. Kaspar, Jonathan D. Cooper, Shaomei Wang, and Jill M. Weimer**

WT

*hCLN6*/DAPI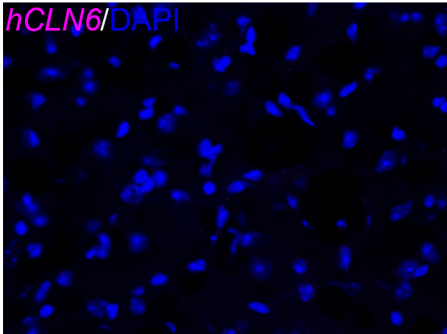*Cln6<sup>nclf</sup>*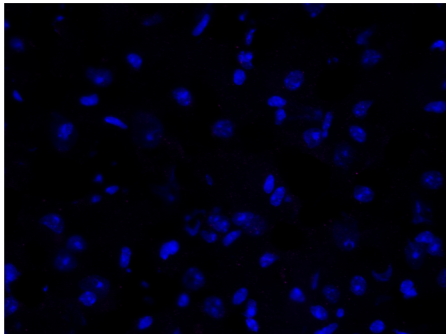*Cln6<sup>nclf</sup>* + scAAV9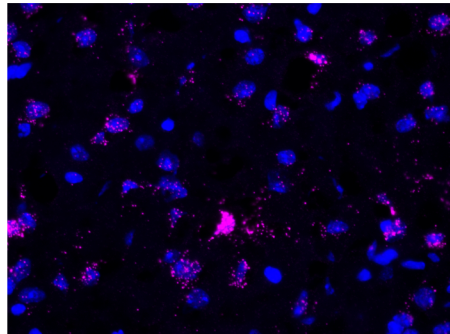

Figure S1. Wildtype and *Cln6<sup>nclf</sup>* control show limited *hCLN6* RNAscope expression, while AAV9 treated *Cln6<sup>nclf</sup>* animal shows robust *hCLN6* expression (purple). Shown in brain tissue.

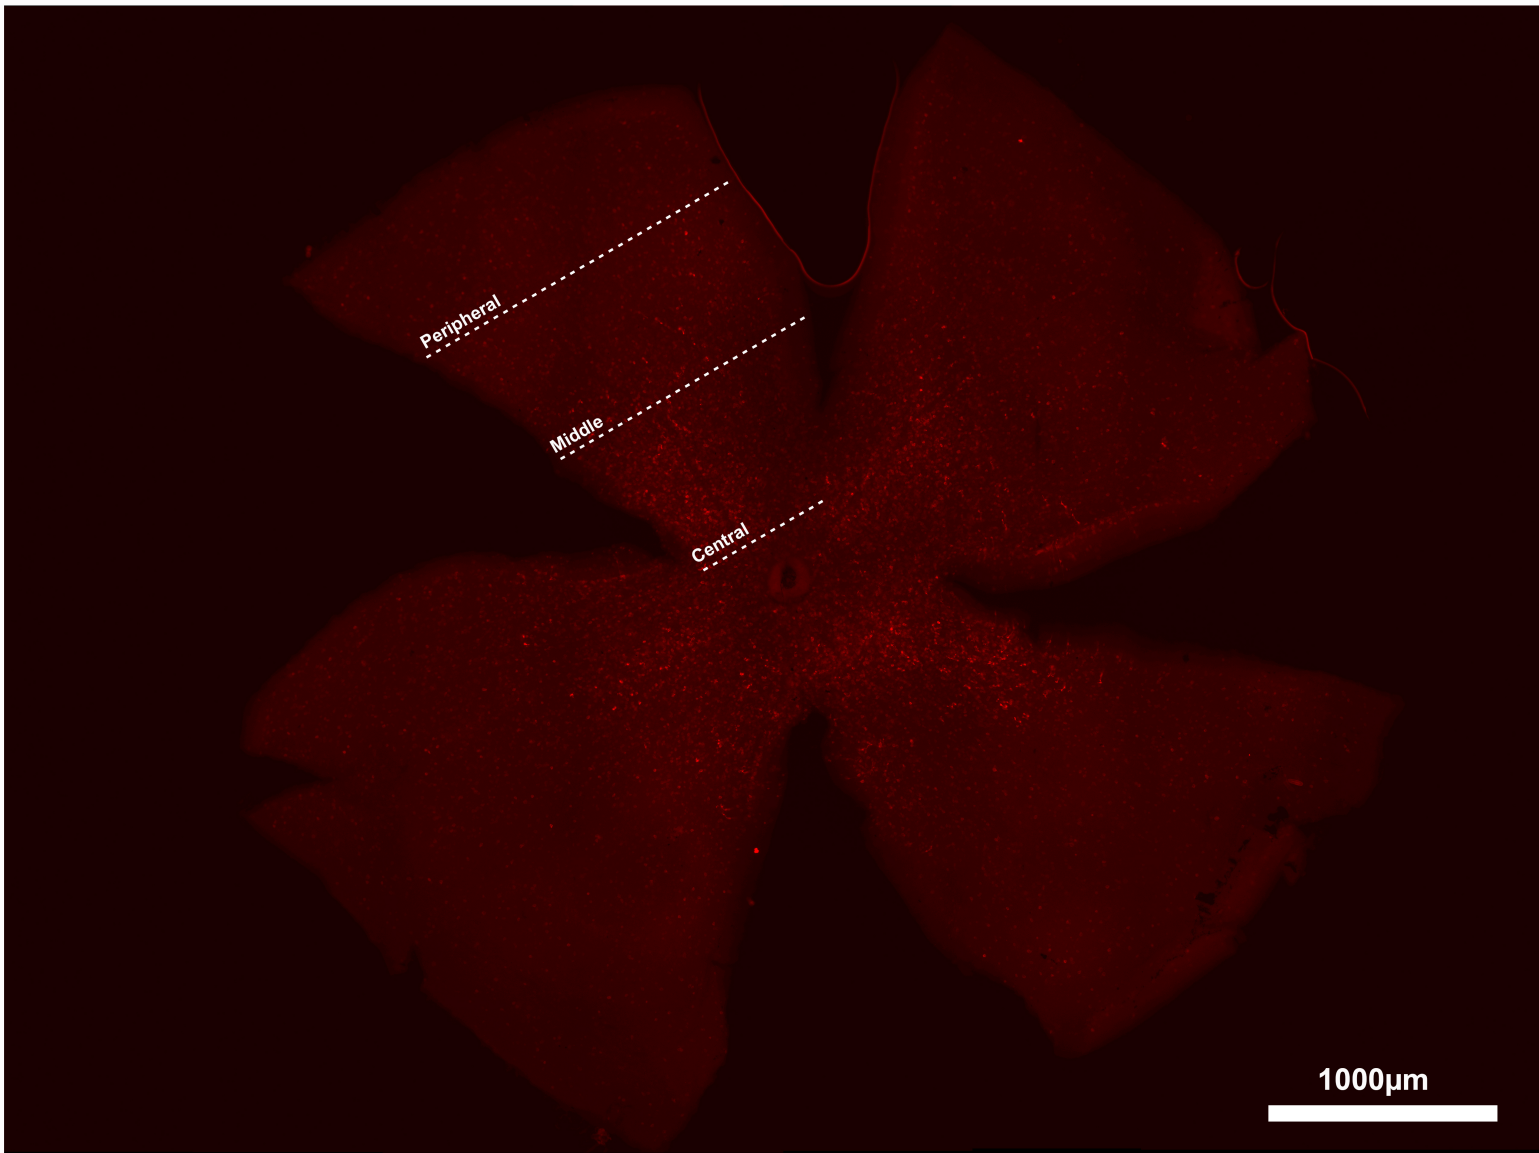

Figure S2. Representative whole-mount image of scAAV9 treated animal shows primarily central retinal expression when immunolabeled with an anti-hCLN6 antibody (red).
